# Supplementary material
Source: Research Square preprint supplement (doi:10.21203/rs.3.rs-9291892/v1)

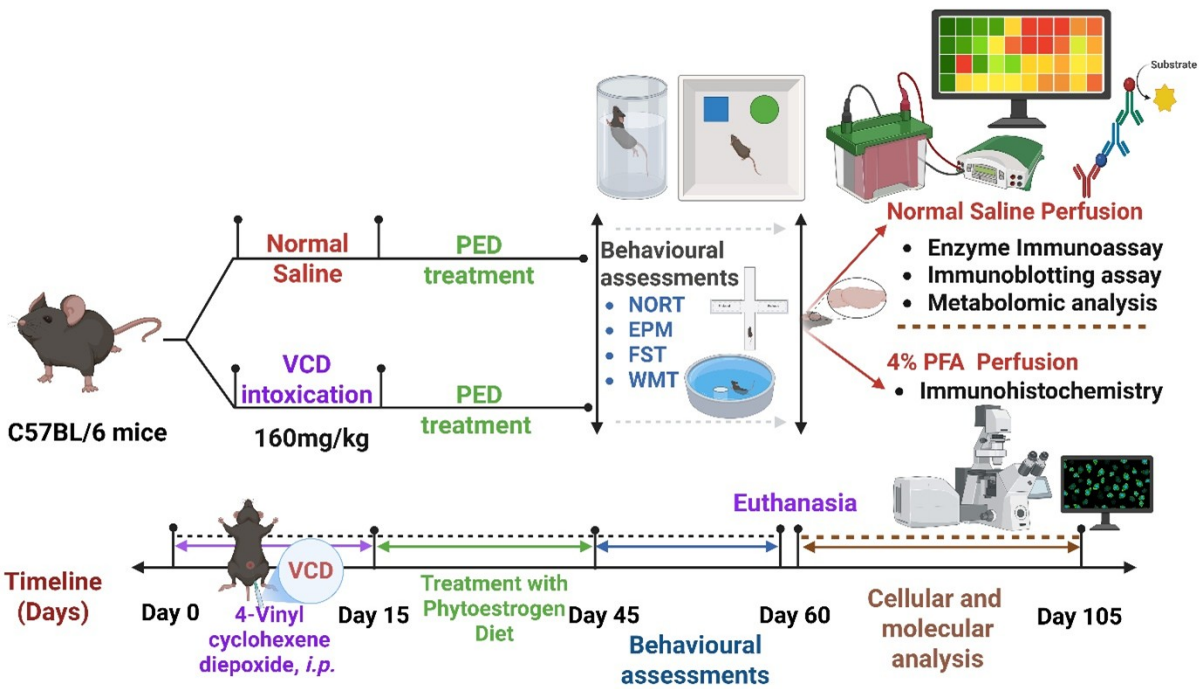

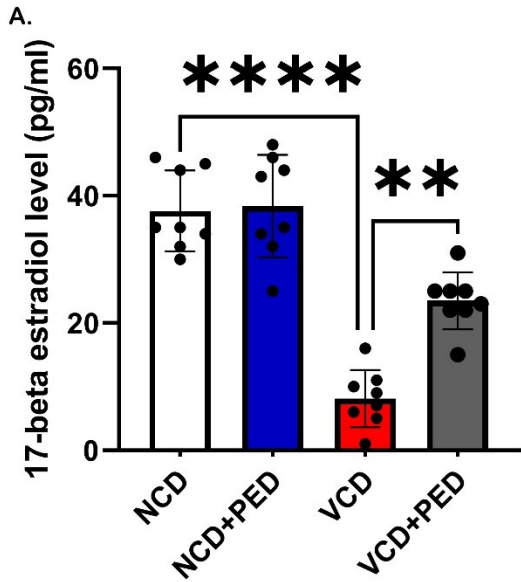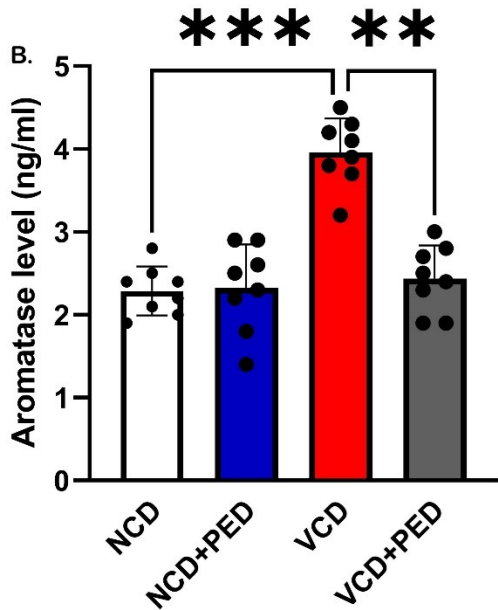

A.

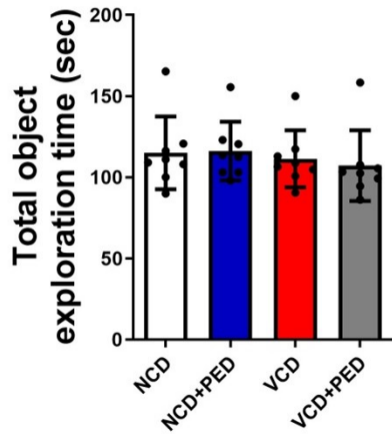

B.

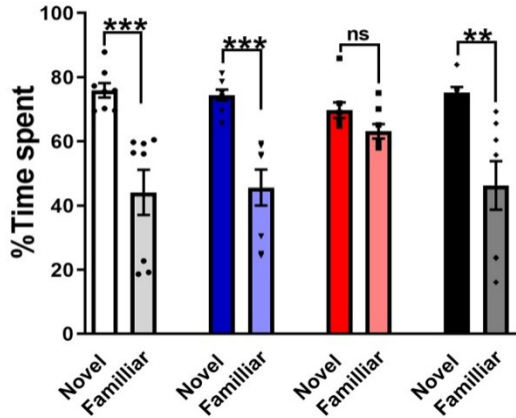

C.

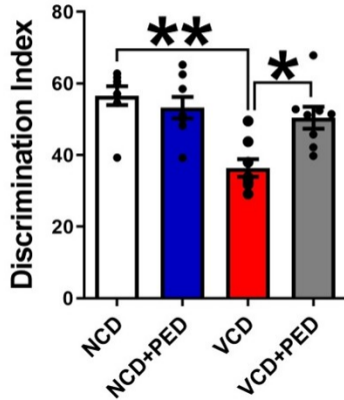

**A.**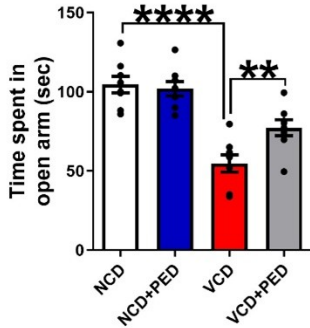**B.**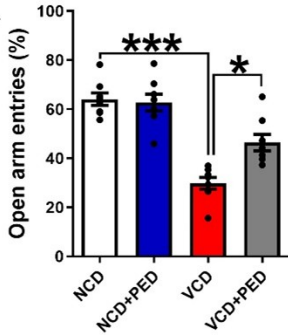**C.**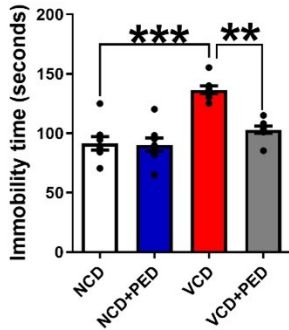

# Water Maze Test (WMT)

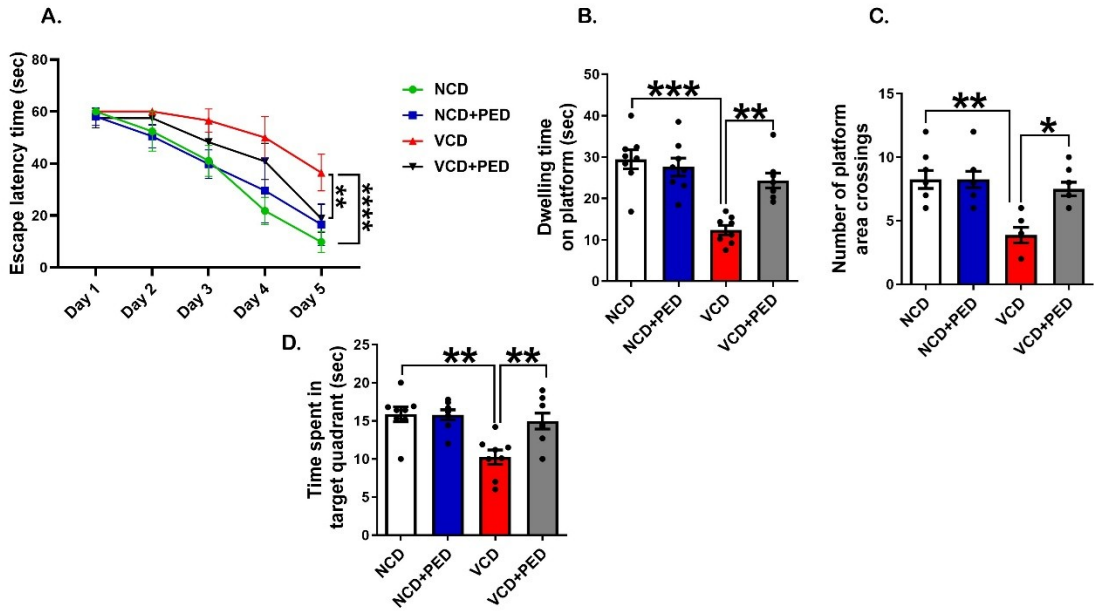

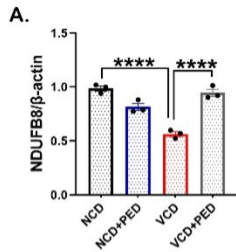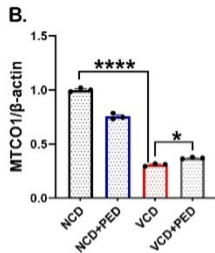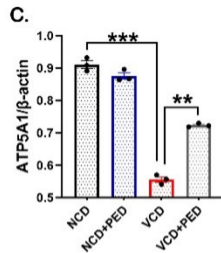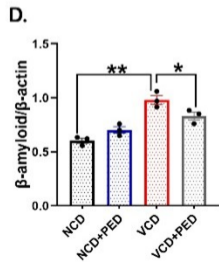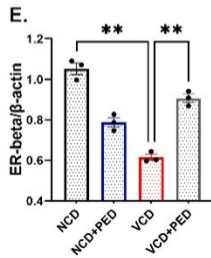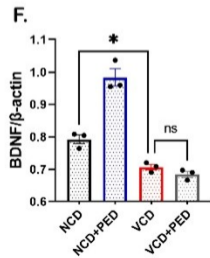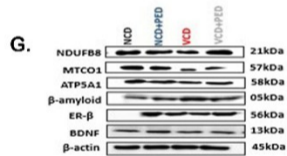

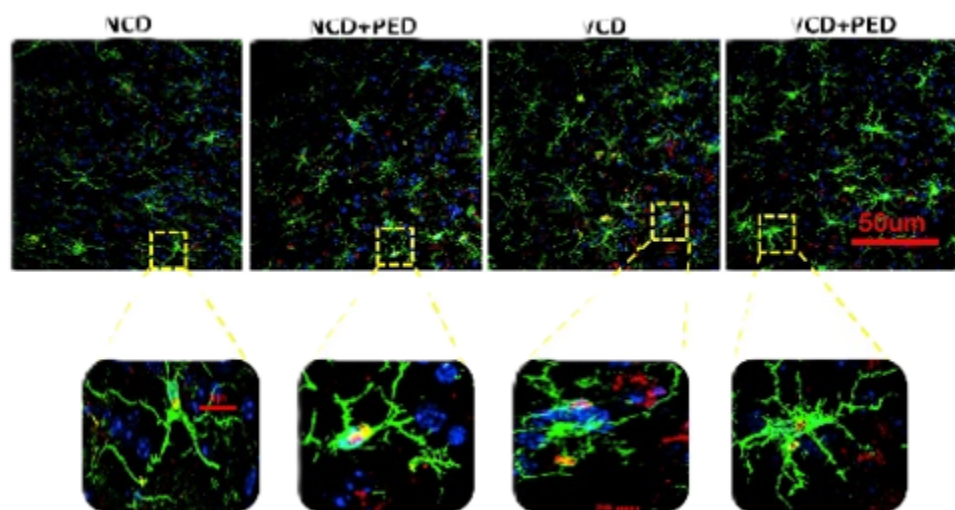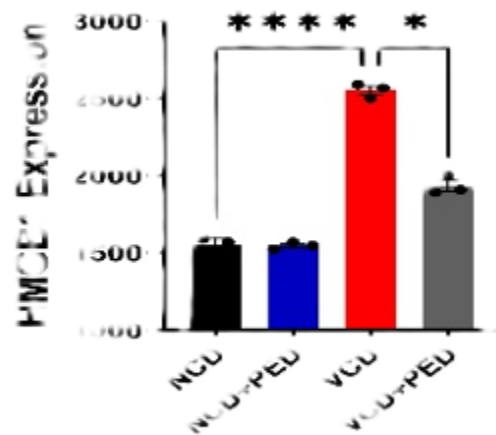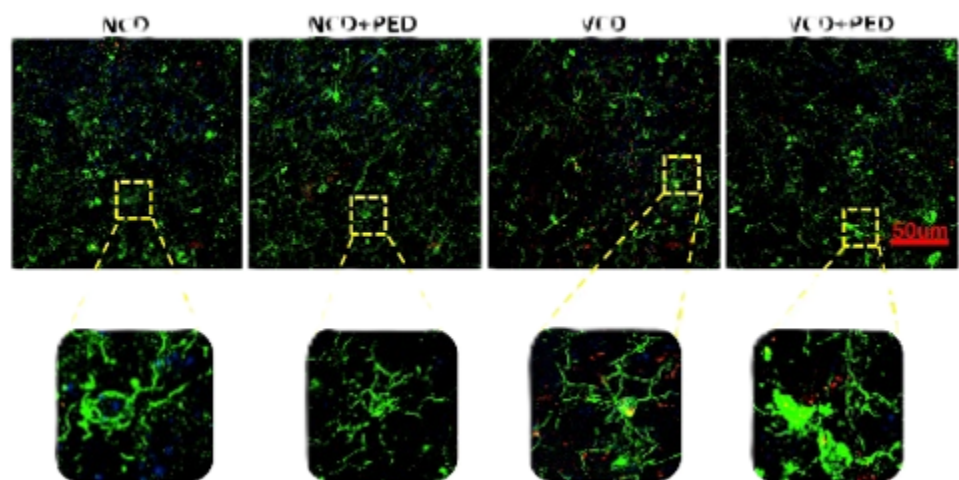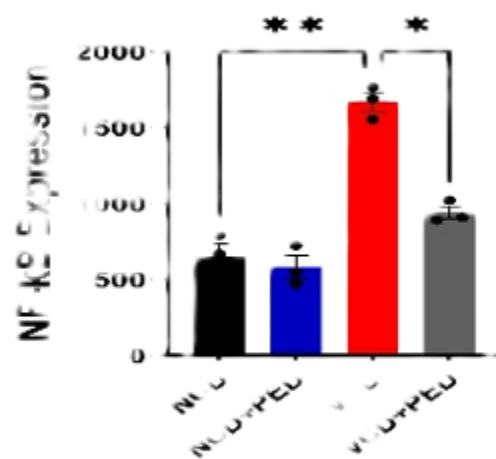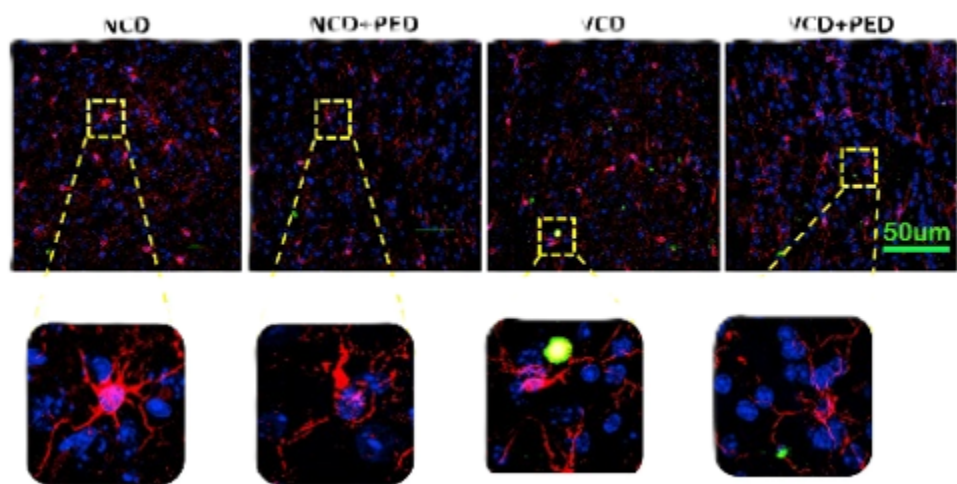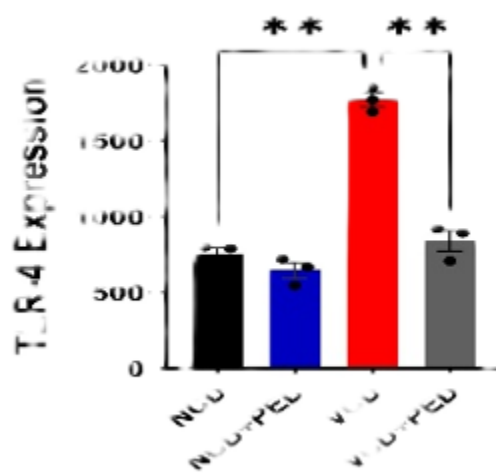

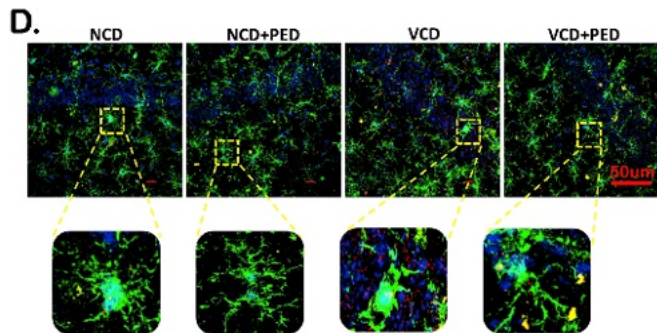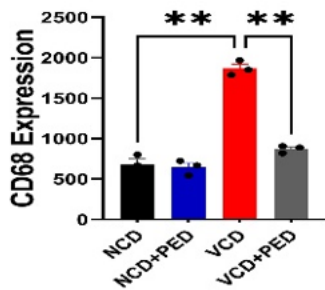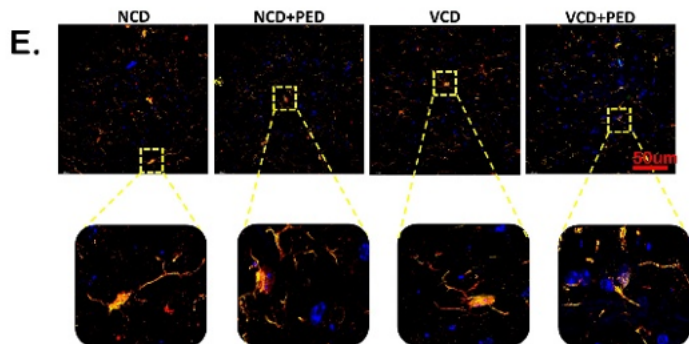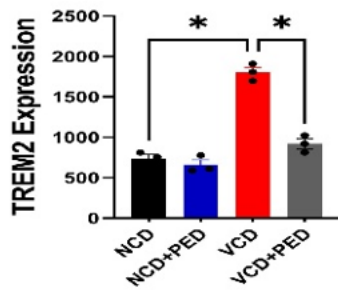

### A. 2DPLS-DA Score Plot

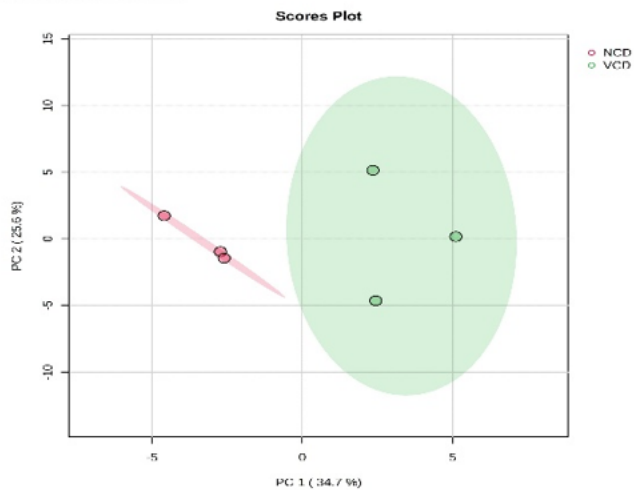

### B. Variable Importance in Projection (VIP) Score Plot

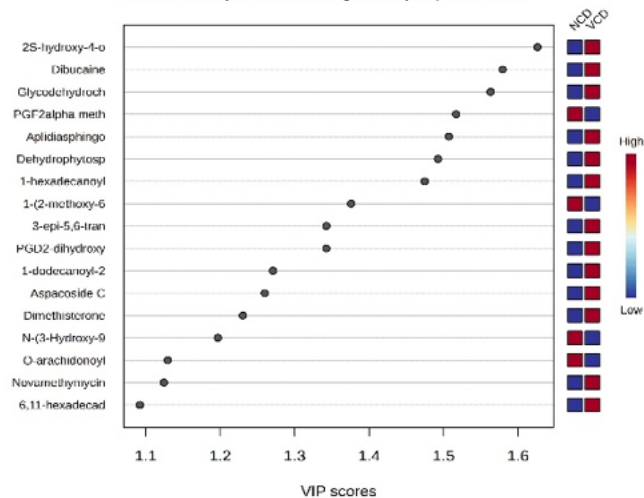

### C. Biplot of DEMs

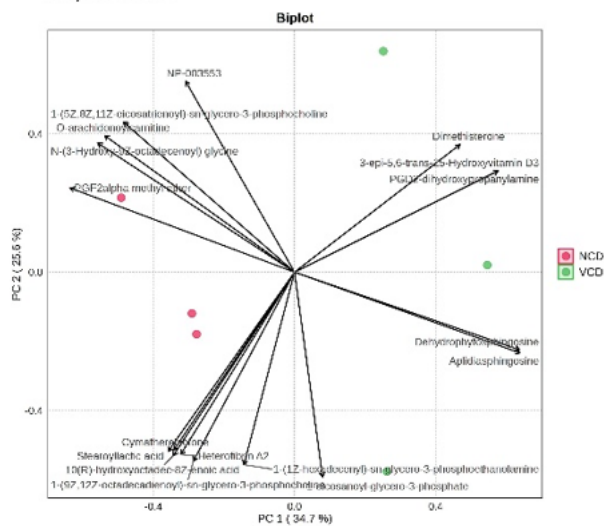

### D. Heatmap clustering

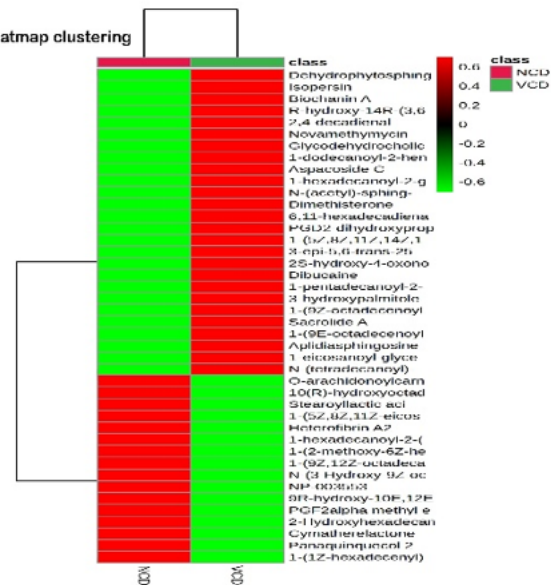

A. 2DPLS-DA Score Plot

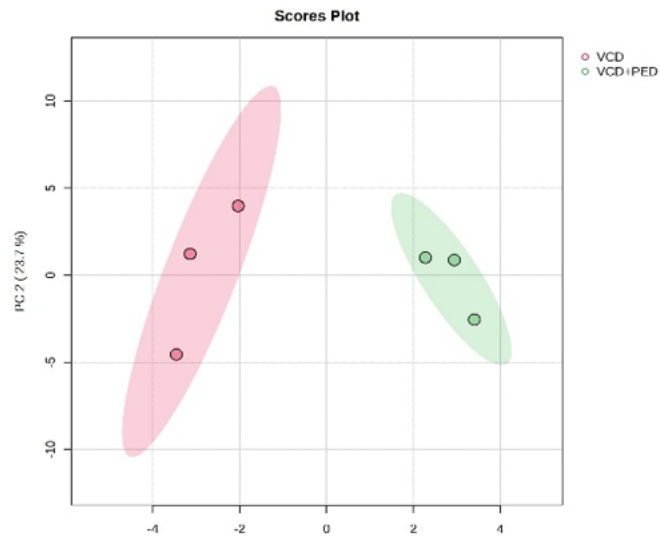

B. VIP Score Plot

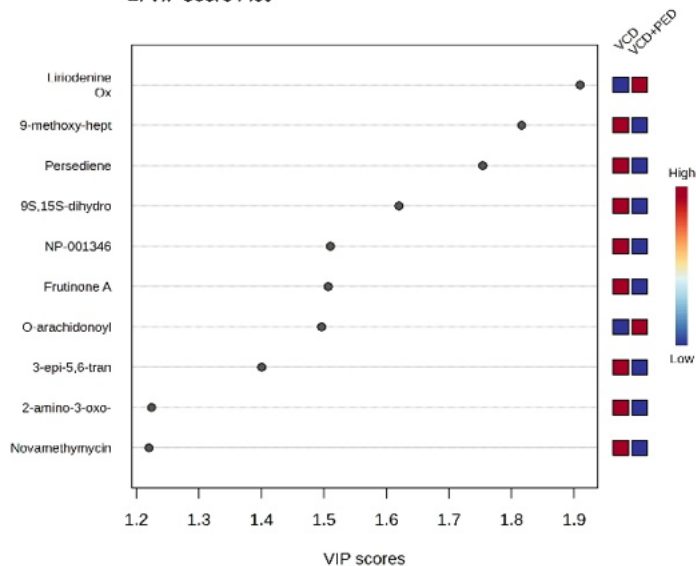

C. Biplot of DEMs

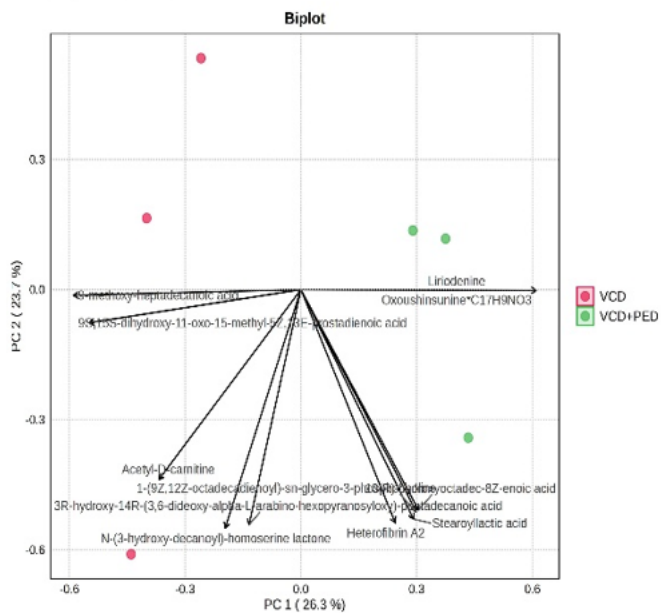

D. Heatmap visualization of DEMs

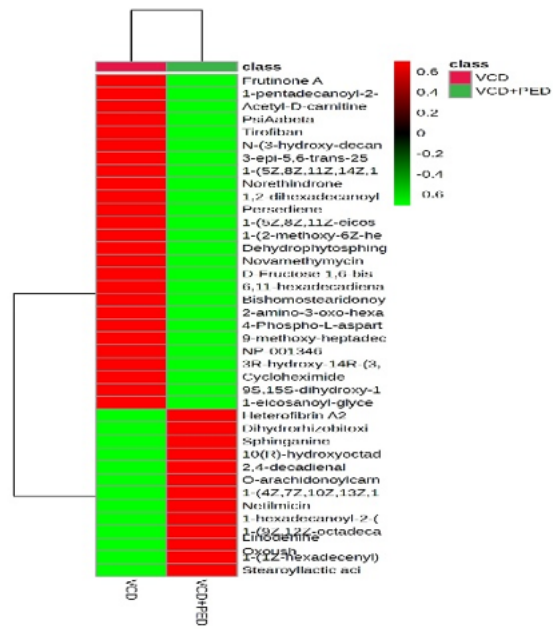

## A. Pathway analysis topology

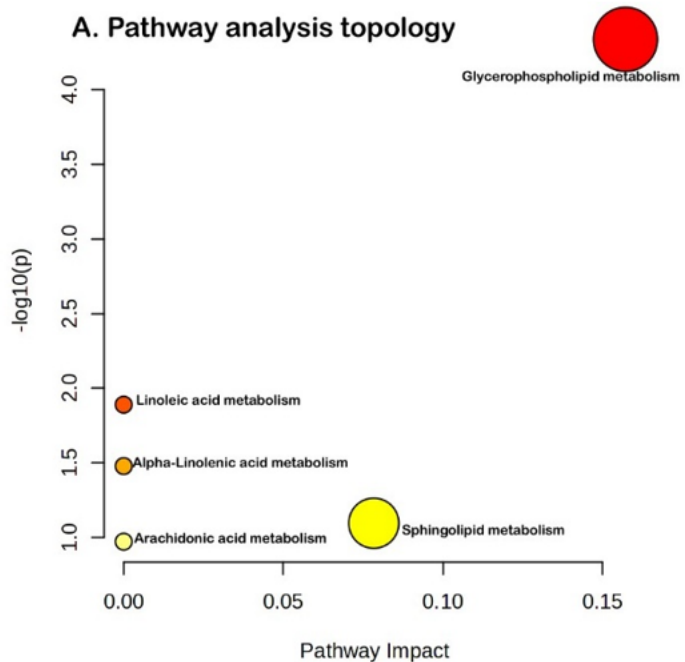

## B. Pathway enrichment network

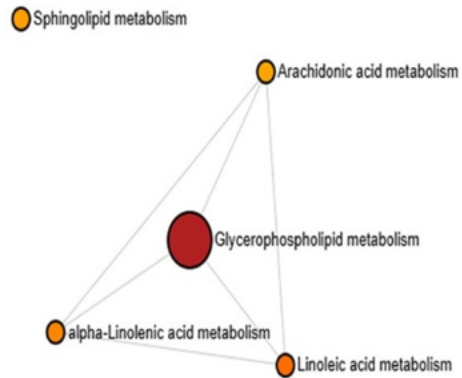

Supplement: Supplementary file 3 [file 7060d312b85a8dec4237790f.pdf]
