# Supplementary material
Source: Research Square preprint supplement (doi:10.21203/rs.3.rs-9291892/v1)
Supplement: Supplementary file 2 [file 68fbb0f51bbb113373e06895.docx]

**Dietary phytoestrogen ameliorates ovarian toxicant–induced neurotoxicity: Mechanistic and metabolic insights**

Ambika Shandilyaa, Suhas Hajarea, Dube Aakash Arwinda, Chander Kant Giria, Rahul Gajbhiyeb, V.Ravichandiranc, Vipan Kumar Parihara,d

aDepartment of Pharmacology and Toxicology, National Institute of Pharmaceutical Education and Research, Hajipur - 844102, Bihar, India

bDepartment of Pharmaceutical Analysis, National Institute of Pharmaceutical Education and Research, Hajipur - 844102, Bihar, India

cDelhi Pharmaceutical Sciences and Research University (DPSRU), New Delhi, India

dDepartment of Pharmaceutical Sciences, Central University of Haryana, Mahendargarh, Haryana, India

**
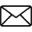
 Corresponding Author**

Dr. Vipan Kumar Parihar

Department of Pharmacology and Toxicology

National Institute of Pharmaceutical Education and Research

Hajipur-844102, Bihar, India

Email: [vipanparihar@gmail.com](mailto:vipanparihar@gmail.com)

**SUPPLEMENTARY FILE 2**

1. **Uncropped image of original NDUFB8 immunoblots:**

**
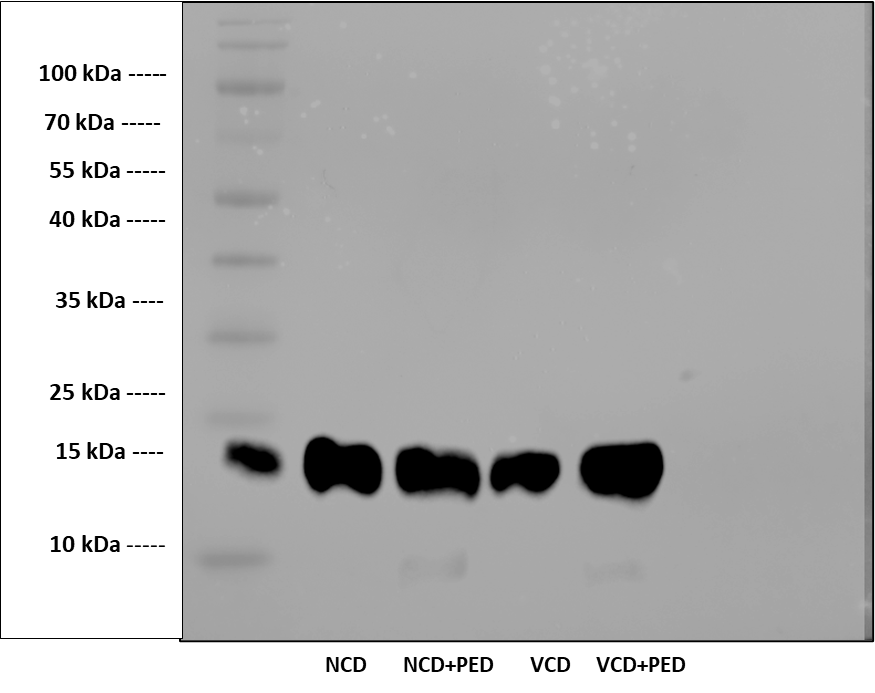
**

1. **Uncropped image of original MTCO1 immunoblots:**

**
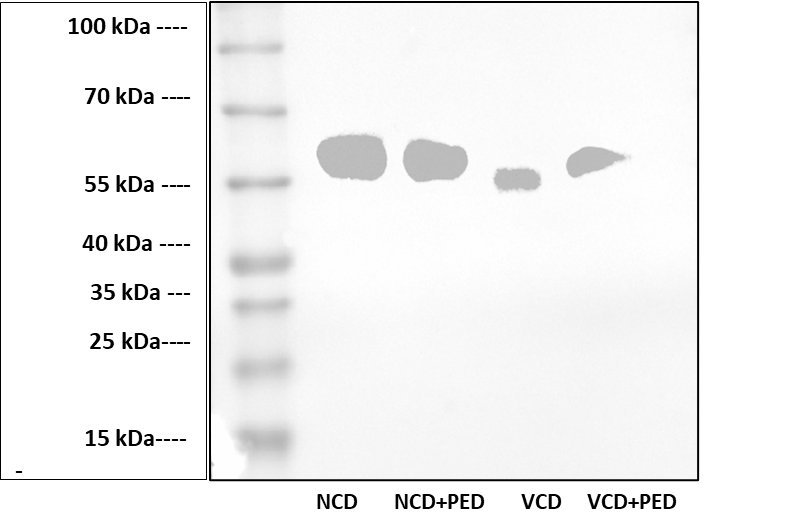
**

1. **Uncropped image of original ATP5A1 immunoblots:**

**
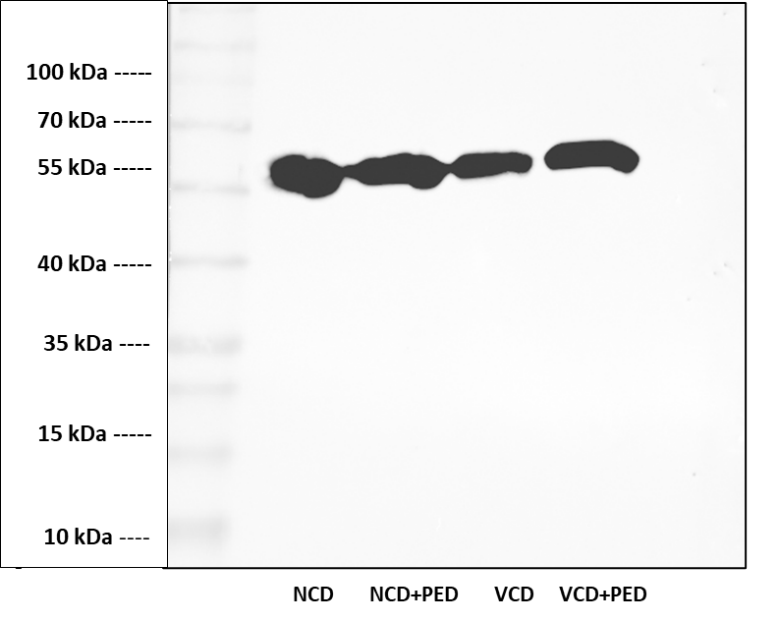
**

1. **Uncropped image of original β-amyloid immunoblots:**


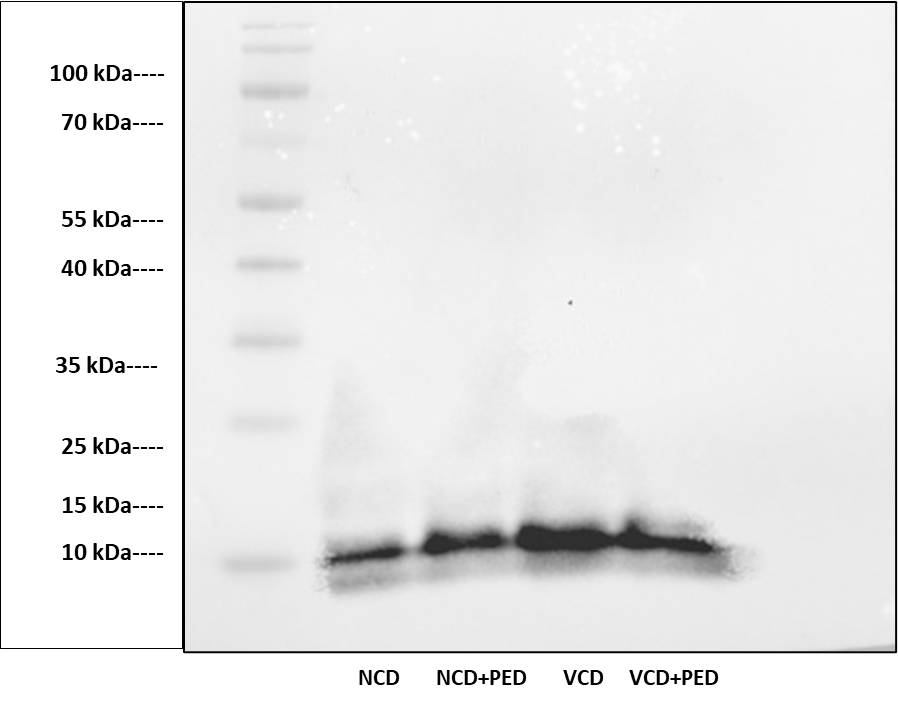


1. **Uncropped image of original BDNF immunoblots:**

**
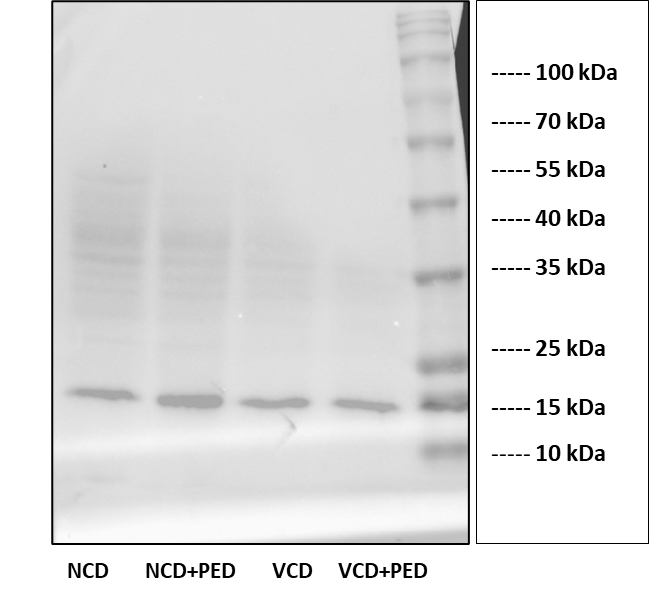
**

1. **Uncropped image of original ER-β immunoblots:**

**
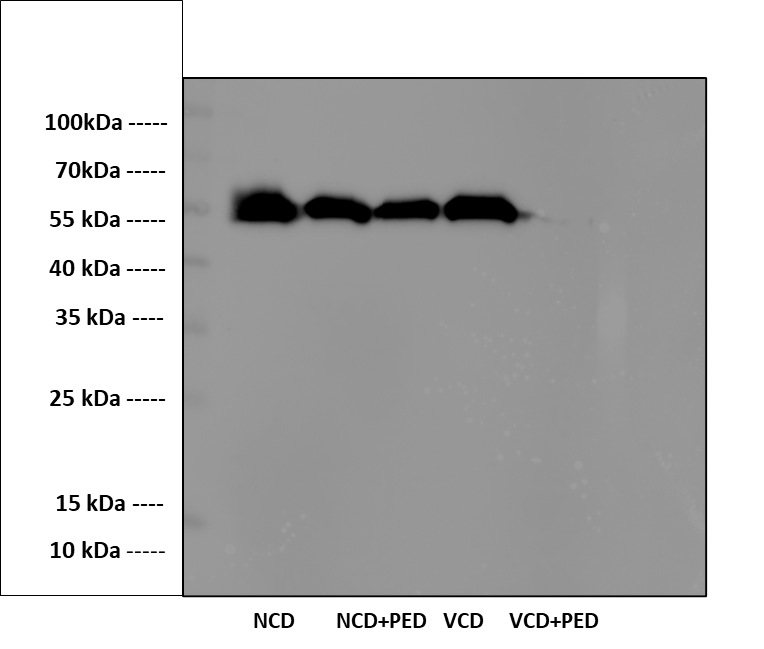
**

1. **Uncropped image of original β-actin immunoblots:**

**
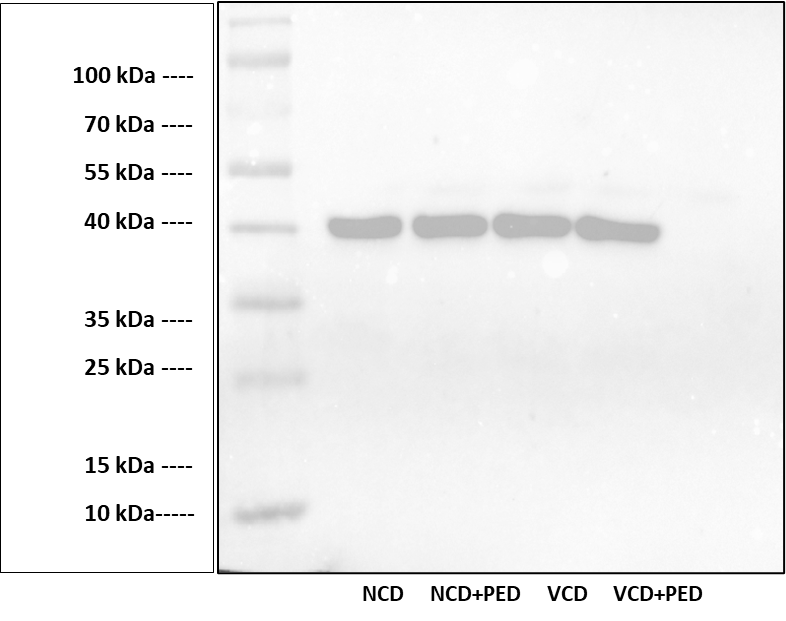
**
